# Supplementary material for: Diverting Stoma Complications in Rectal Cancer Surgery.
Source: Research Square preprint supplement (doi:10.21203/rs.3.rs-246835/v1), 2021-03-11
Supplement: Supplementary file 2 [file 4174e4ee661bb6e38139aa48.xlsx]

## Sheet: Table1
Table1	Baseline Characteristics
		N = 400
	Age (years)	64 (25-86)
	Gender (M：F)	267：133
	BMI (kg/m2)	23.0 (14.3-34.4)
	Location (RS：Ra：Rb)	115：172：112
	pStage (I: II: III: IV)	111：98：120：23
	Approach (Lap：Open)	272：128
	Procedure (HAR：LAR：ISR)	55：308：37
	Ano-anastomotic distance (cm)	6 (2-15)
	Postoperative complications
	No. of patients with POCs	120 (30.0%)
	Anastomotic leakage	50 (12.5%)
	Bowel obstruction*	49 (12.3%)
	SRCs	33
	Postoperative hospitalization (day)	13 (7-97)
	Re-operation	19 (4.8%)
	Mortality (within 30 days of surgery)	1 (0.2%)
	BMI: body mass index, *including stoma outlet syndrome (N=19)
	RS: sectosigmolid, Ra; upper rectum, Rb; lower rectum
	HAR: High anterior resection, LAR: lower anterior resection, ISR: Intersphincteric resection
	Lap: Laparoscopic surgery, Open: Open surgery, SRC: stoma-related complication

## Sheet: Table2
Table2	Patient Characteristics
		DS(-) group	DS(+) group	p-value
		(N=247)	(N=153)
	Age (y)	63 (25-85)	64 (32-86)	0.3
	Gender (M：F)	157 ： 90	110：43	0.08
	BMI (kg/m2)	23 (16.4-34.4)	22.9 (12.3-33.9)	0.24
	Location (RS：Ra：Rb)	107：125：14	8：47：98	<0.01
	Preoperative treatment	6(2.4%)	27(17.6%)	<0.01
	CRT	1	8	-
	NAC	5	19	-
	pStage (I: II: III: IV)	67：65：85：18	62：39：45：7	0.03
	BMI: body mass index,	RS: sectosigmolid, Ra; upper rectum, Rb; lower rectum
	CRT: Chemo radio therapy, NAC :Neo adjuvant chemotherapy

## Sheet: Table3
Table3	Surgical Outcomes
		DS(-) group	DS(+) group	p-value
		(N=247)	(N=153)
	Procedure (HAR：LAR：ISR)	53：194：0	2：114：37	<0.01
	Lateral lymph node dissection	2 (0.8%)	19 (12.4%)	<0.01
	Approach (Lap：Open)	159：88	113：40	0.05
	Operation time (min)	268 (145-805)	405 (240-722)	<0.01
	Blood loss (mL)	30 (1-1500)	50 (6-770)	0.84
	Ano-anastomotic distance (cm)	8 (4-15)	4 (2-14)	<0.01
	Stoma site (Ileum：Colon)	-	148：3	-
	HAR: High anterior resection, LAR: lower anterior resection, ISR: intersphincteric resection
	Lap: Laparoscopic surgery, Open: Open surgery

## Sheet: Table4
Table4		Short-term outcomes
				DS (-) group	DS (+) group	p-value
				(N=247)	(N=153)
	Oral ingestion (POD)			6 (4-41)	4 (2-18)	0.01
	Complication (CTCAE v4.0)
		Total	All Grade	57	89	<0.01
			G1	6	19	<0.01
			G2	34	42	<0.01
			G3	17	28	<0.01
			G3a	5	21	<0.01
			G3b	12	7	0.9
			G4	0	0	-
			G5	0	1	0.2
		Leakage	All Grade	27 (10.9%)	23 (15.0%)	0.31
			G1	0 (0%)	11 (7.2%)	<0.01
			G2	16 (6.5%)	12 (7.8%)	0.6
			G3a	0 (0%)	0 (0%)	-
			G3b	11 (4.5%)	0 (0%)	0.01
		Bowel obstruction	All Grade	10 (4.0%)	39 (25.5%)	<0.01
			G1	0 (0%)	0 (0%)	-
			G2	4 (1.6%)	13 (8.5%)	<0.01
			G3a	5 (2.0%)	21 (13.7%)	<0.01
			G3b	1 (0.4%)	5 (3.3%)	0.02
		SSI	All Grade	6 (2.4%)	3 (2.0%)	0.56
			G1	6 (2.4%)	2 (1.3%)	0.44
			G2	0 (0%)	0 (0%)	-
			G3a	0 (0%)	0 (0%)	-
			G3b	0 (0%)	1 (0.7%)	0.2
		Urinary disturbance	All Grade	14 (5.7%)	11 (7.2%)	0.55
			G1	0 (0%)	0 (0%)	-
			G2	14 (5.7%)	11 (7.2%)	0.55
			G3a	0 (0%)	0 (0%)	-
			G3b	0 (0%)	0 (0%)	-
	Hospitalization (day)			12 (7-85)	15 (8-97)	0.02
	Re-operation			12 (4.9%)	7 (4.6%)	0.9
	POD: Post operative day, SSI: Surgical site infection
	CTCAE: Common Terminology Criteria for Adverse Events,

## Sheet: Table5
Table5	Stoma-related complications (SRC)
		G1	G2	G3a	G3b		Total
	Stoma outlet syndrome	0	0	15	4		19
	Electrolyte imbalance	0	6	0	1		7
	Peristomal dermatitis	6	0	0	0		6
	Mucocutaneous separation of stoma	0	0	0	1		1
		6	6	15	6		33
